# Supplementary material for: Solving a Large-Scale Multi-Depot Vehicle Scheduling Problem in Urban Bus Systems
Source: Hindawi journal article supplement (doi:10.1155/2018/4868906), 2018-08-23
Supplement: f1 [file 4868906.f1.docx]

Supplementary Materials


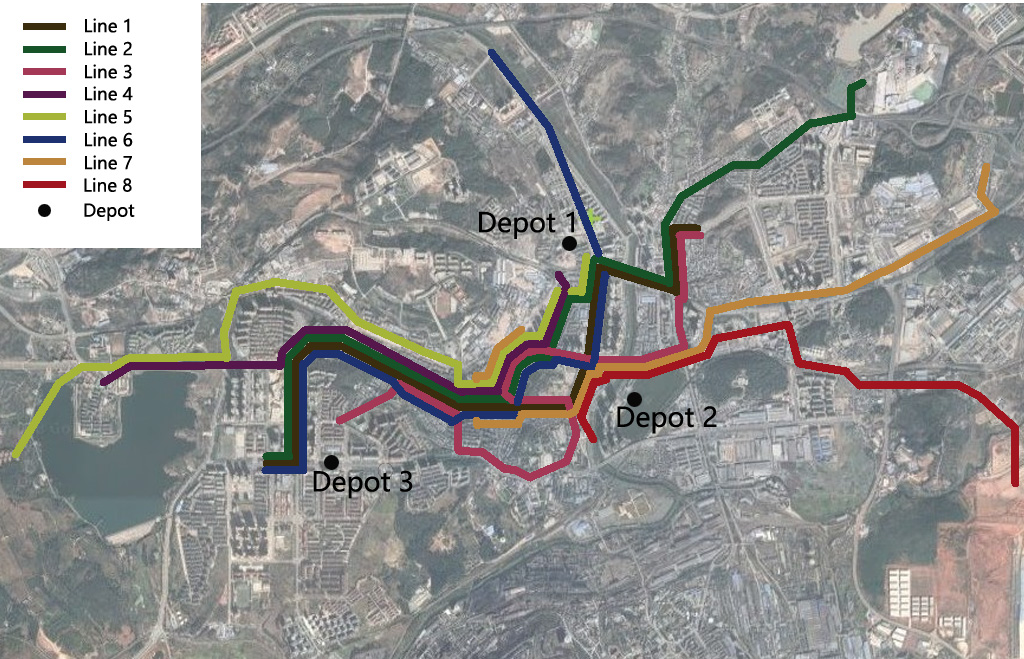


**FIGURE S1 Routes of the 8 bus lines and positions of the 3 depots.**

**Table S1. Basic information for the case study bus lines.**

| **Line Name** | **Line Length (km)** | **Average Speed (km/h)** | **Opening Time** | **Closing Time** | **Number of Timetabled Trips** |
| --- | --- | --- | --- | --- | --- |
| **Line 1** | 5.8 | 19.6 | 6:40 | 22:00 | 135 |
| **Line 2** | 7.9 | 19.3 | 6:40 | 22:00 | 138 |
| **Line 3** | 5.7 | 16.1 | 6:40 | 22:00 | 124 |
| **Line 4** | 6.1 | 15.4 | 6:55 | 22:00 | 122 |
| **Line 5** | 6.5 | 14.5 | 6:30 | 20:30 | 112 |
| **Line 6** | 5.8 | 15.6 | 6:50 | 20:30 | 138 |
| **Line 7** | 5.5 | 17.7 | 7:00 | 20:00 | 65 |
| **Line 8** | 4.7 | 21.9 | 7:00 | 21:30 | 96 |

**Table S2. Travel Time between the depots and the origin (destination) stations of each bus line.**

| **Depot Name** | **Depot 1** | **Depot 2** | **Depot 3** |
| --- | --- | --- | --- |
| **Time (min)** |
| **Station Name** |
| **1-O** | 4 | 7 | 9 |
| **1-D** | 17 | 12 | 3 |
| **2-O** | 8 | 10 | 18 |
| **2-D** | 17 | 12 | 3 |
| **3-O** | 4 | 7 | 9 |
| **3-D** | 14 | 9 | 2 |
| **4-O** | 16 | 11 | 5 |
| **4-D** | 18 | 13 | 7 |
| **5-O** | 1 | 3 | 15 |
| **5-D** | 35 | 32 | 22 |
| **6-O** | 5 | 9 | 19 |
| **6-D** | 17 | 12 | 3 |
| **7-O** | 16 | 11 | 5 |
| **7-D** | 12 | 15 | 22 |
| **8-O** | 4 | 2 | 10 |
| **8-D** | 13 | 13 | 21 |

**Table S3. Travel Time between different origin and destination stations of each bus line.**

| **Time (min)** | **1-O** | **1-D** | **2-O** | **2-D** | **3-O** | **3-D** | **4-O** | **4-D** | **5-O** | **5-D** | **6-O** | **6-D** | **7-O** | **7-D** | **8-O** | **8-D** |
| --- | --- | --- | --- | --- | --- | --- | --- | --- | --- | --- | --- | --- | --- | --- | --- | --- |
| **1-O** | 0 | 4 | 0 | 18 | 5 | 8 | 18 | 10 | 20 | 20 | 17 | 20 | 38 | 20 | 13 | 14 |
| **1-D** | 4 | 0 | 4 | 19 | 8 | 11 | 19 | 11 | 21 | 21 | 16 | 23 | 41 | 21 | 6 | 12 |
| **2-O** | 0 | 4 | 0 | 18 | 5 | 8 | 18 | 10 | 20 | 20 | 17 | 20 | 38 | 20 | 13 | 14 |
| **2-D** | 18 | 19 | 18 | 0 | 16 | 21 | 0 | 11 | 4 | 4 | 4 | 6 | 18 | 4 | 20 | 21 |
| **3-O** | 5 | 8 | 5 | 16 | 0 | 5 | 16 | 4 | 18 | 18 | 14 | 20 | 34 | 18 | 9 | 14 |
| **3-D** | 8 | 11 | 8 | 21 | 5 | 0 | 21 | 10 | 22 | 22 | 18 | 24 | 38 | 22 | 12 | 17 |
| **4-O** | 18 | 19 | 18 | 0 | 16 | 21 | 0 | 11 | 4 | 4 | 4 | 6 | 18 | 4 | 20 | 21 |
| **4-D** | 10 | 11 | 10 | 11 | 4 | 10 | 11 | 0 | 13 | 13 | 8 | 15 | 31 | 13 | 11 | 12 |
| **5-O** | 20 | 21 | 20 | 4 | 18 | 22 | 4 | 13 | 0 | 0 | 5 | 8 | 22 | 0 | 25 | 24 |
| **5-D** | 20 | 21 | 20 | 4 | 18 | 22 | 4 | 13 | 0 | 0 | 5 | 8 | 22 | 0 | 25 | 24 |
| **6-O** | 17 | 16 | 17 | 4 | 14 | 18 | 4 | 8 | 5 | 5 | 0 | 6 | 21 | 5 | 21 | 19 |
| **6-D** | 20 | 23 | 20 | 6 | 20 | 24 | 6 | 15 | 8 | 8 | 6 | 0 | 19 | 8 | 27 | 25 |
| **7-O** | 38 | 41 | 38 | 18 | 34 | 38 | 18 | 31 | 22 | 22 | 21 | 19 | 0 | 22 | 45 | 46 |
| **7-D** | 20 | 21 | 20 | 4 | 18 | 22 | 4 | 13 | 0 | 0 | 5 | 8 | 22 | 0 | 25 | 24 |
| **8-O** | 13 | 6 | 13 | 20 | 9 | 12 | 20 | 11 | 25 | 25 | 21 | 27 | 45 | 25 | 0 | 14 |
| **8-D** | 14 | 12 | 14 | 21 | 14 | 17 | 21 | 12 | 24 | 24 | 19 | 25 | 46 | 24 | 14 | 0 |

**Table S4. Timetabled trips of the bus lines for the real-life case.**

| **Line Name** | **Timetabled Trips** | | | | | | |
| --- | --- | --- | --- | --- | --- | --- | --- |
| **Line 1 (upward)** | 06:40(000) | 06:50(001) | 07:00(002) | 07:10(003) | 07:20(004) | 07:30(005) | 07:40(006) |
| 07:50(007) | 08:00(008) | 08:10(009) | 08:20(010) | 08:30(011) | 08:40(012) | 08:50(013) |
| 09:00(014) | 09:20(015) | 09:40(016) | 10:00(017) | 10:20(018) | 10:40(019) | 11:00(020) |
| 11:10(021) | 11:20(022) | 11:30(023) | 11:40(024) | 11:50(025) | 12:00(026) | 12:10(027) |
| 12:20(028) | 12:30(029) | 12:40(030) | 12:50(031) | 13:00(032) | 13:10(033) | 13:20(034) |
| 13:30(035) | 13:40(036) | 13:50(037) | 14:00(038) | 14:20(039) | 14:40(040) | 15:00(041) |
| 15:20(042) | 15:40(043) | 16:00(044) | 16:20(045) | 16:40(046) | 16:50(047) | 17:00(048) |
| 17:10(049) | 17:20(050) | 17:30(051) | 17:40(052) | 17:50(053) | 18:00(054) | 18:10(055) |
| 18:20(056) | 18:30(057) | 18:40(058) | 18:50(059) | 19:00(060) | 19:20(061) | 19:40(062) |
| 20:00(063) | 20:20(064) | 20:40(065) | 21:00(066) | 21:20(067) | 21:40(068) | 22:00(069) |
| **Line 1 (downward)** | 06:40(070) | 06:50(071) | 07:00(072) | 07:10(073) | 07:20(074) | 07:30(075) | 07:40(076) |
| 07:50(077) | 08:00(078) | 08:10(079) | 08:20(080) | 08:30(081) | 08:40(082) | 09:00(083) |
| 09:20(084) | 09:40(085) | 10:00(086) | 10:20(087) | 10:40(088) | 11:00(089) | 11:10(090) |
| 11:20(091) | 11:30(092) | 11:40(093) | 11:50(094) | 12:00(095) | 12:20(096) | 12:40(097) |
| 13:00(098) | 13:10(099) | 13:20(100) | 13:30(101) | 13:40(102) | 13:50(103) | 14:00(104) |
| 14:20(105) | 14:40(106) | 15:00(107) | 15:20(108) | 15:40(109) | 16:00(110) | 16:20(111) |
| 16:40(112) | 17:00(113) | 17:10(114) | 17:20(115) | 17:30(116) | 17:40(117) | 17:50(118) |
| 18:00(119) | 18:10(120) | 18:20(121) | 18:30(122) | 18:40(123) | 18:50(124) | 19:00(125) |
| 19:20(126) | 19:40(127) | 20:00(128) | 20:20(129) | 20:40(130) | 21:00(131) | 21:20(132) |
| 21:40(133) | 22:00(134) |  |  |  |  |  |
| **Line 2 (upward)** | 06:40(135) | 06:45(136) | 06:50(137) | 07:00(138) | 07:05(139) | 07:10(140) | 07:15(141) |
| 07:20(142) | 07:25(143) | 07:30(144) | 07:40(145) | 07:50(146) | 08:00(147) | 08:10(148) |
| 08:20(149) | 08:30(150) | 08:40(151) | 08:50(152) | 09:00(153) | 09:15(154) | 09:30(155) |
| 09:45(156) | 10:00(157) | 10:15(158) | 10:30(159) | 10:45(160) | 11:00(161) | 11:15(162) |
| 11:30(163) | 11:45(164) | 12:00(165) | 12:15(166) | 12:30(167) | 12:45(168) | 13:00(169) |
| 13:15(170) | 13:30(171) | 13:45(172) | 14:00(173) | 14:15(174) | 14:30(175) | 14:45(176) |
| 15:00(177) | 15:15(178) | 15:30(179) | 15:45(180) | 16:00(181) | 16:15(182) | 16:30(183) |
| 16:45(184) | 17:00(185) | 17:15(186) | 17:20(187) | 17:25(188) | 17:30(189) | 17:35(190) |
| 17:40(191) | 17:45(192) | 17:50(193) | 18:00(194) | 18:10(195) | 18:20(196) | 18:30(197) |
| 18:40(198) | 18:50(199) | 19:00(200) | 19:15(201) | 19:30(202) | 19:45(203) | 20:00(204) |
| 20:15(205) | 20:30(206) | 20:45(207) | 21:00(208) | 21:15(209) | 21:30(210) | 21:45(211) |
| 22:00(212) |  |  |  |  |  |  |
| **Line 2 (downward)** | 06:40(213) | 06:50(214) | 07:00(215) | 07:10(216) | 07:20(217) | 07:30(218) | 07:40(219) |
| 07:50(220) | 08:00(221) | 08:10(222) | 08:20(223) | 08:30(224) | 08:40(225) | 08:50(226) |
| 09:00(227) | 09:15(228) | 09:30(229) | 09:45(230) | 10:00(231) | 10:15(232) | 10:30(233) |
| 10:45(234) | 11:00(235) | 11:15(236) | 11:30(237) | 11:45(238) | 12:00(239) | 12:15(240) |
| 12:30(241) | 12:45(242) | 13:00(243) | 13:15(244) | 13:30(245) | 13:45(246) | 14:00(247) |
| 14:15(248) | 14:30(249) | 14:45(250) | 15:00(251) | 15:15(252) | 15:30(253) | 15:45(254) |
| 16:00(255) | 16:15(256) | 16:30(257) | 16:45(258) | 17:00(259) | 17:15(260) | 17:30(261) |
| 17:45(262) | 18:00(263) | 18:20(264) | 18:40(265) | 19:00(266) | 19:30(267) | 20:00(268) |
| 20:30(269) | 21:00(270) | 21:30(271) | 22:00(272) |  |  |  |
| **Line 3 (upward)** | 06:40(273) | 06:50(274) | 06:55(275) | 07:00(276) | 07:05(277) | 07:10(278) | 07:15(279) |
| 07:20(280) | 07:30(281) | 07:40(282) | 07:50(283) | 08:00(284) | 08:10(285) | 08:25(286) |
| 08:40(287) | 09:55(288) | 10:10(289) | 10:25(290) | 10:40(291) | 10:55(292) | 11:00(293) |
| 11:08(294) | 11:15(295) | 11:25(296) | 11:35(297) | 11:45(298) | 11:55(299) | 12:10(300) |
| 12:30(301) | 12:40(302) | 12:50(303) | 13:00(304) | 13:15(305) | 13:25(306) | 13:35(307) |
| 13:45(308) | 13:55(309) | 14:05(310) | 14:15(311) | 14:25(312) | 14:35(313) | 14:55(314) |
| 14:10(315) | 14:30(316) | 14:50(317) | 15:10(318) | 15:30(319) | 15:50(320) | 16:10(321) |
| 16:30(322) | 16:50(323) | 17:20(324) | 17:50(325) | 18:20(326) | 18:40(327) | 19:00(328) |
| 19:30(329) | 20:55(330) | 21:15(331) | 21:30(332) | 22:00(333) |  |  |
| **Line 3 (downward)** | 06:40(334) | 06:55(335) | 07:15(336) | 07:30(337) | 07:40(338) | 07:55(339) | 08:05(340) |
| 08:15(341) | 08:25(342) | 08:30(343) | 08:40(344) | 08:50(345) | 09:00(346) | 09:15(347) |
| 09:30(348) | 09:45(349) | 10:00(350) | 10:15(351) | 10:30(352) | 10:45(353) | 11:00(354) |
| 11:30(355) | 11:45(356) | 12:00(357) | 12:10(358) | 12:20(359) | 12:40(360) | 12:50(361) |
| 13:00(362) | 13:15(363) | 13:30(364) | 13:45(365) | 13:05(366) | 13:25(367) | 13:45(368) |
| 14:05(369) | 14:25(370) | 14:45(371) | 15:05(372) | 15:30(373) | 15:55(374) | 16:20(375) |
| 16:40(376) | 17:00(377) | 17:10(378) | 17:23(379) | 17:36(380) | 17:50(381) | 18:05(382) |
| 18:30(383) | 19:00(384) | 19:10(385) | 19:20(386) | 19:30(387) | 19:40(388) | 19:50(389) |
| 20:00(390) | 20:15(391) | 20:30(392) | 20:45(393) | 21:00(394) | 21:30(395) | 22:00(396) |
| **Line 4 (upward)** | 06:55(397) | 06:05(398) | 06:15(399) | 06:25(400) | 06:35(401) | 06:45(402) | 06:55(403) |
| 07:05(404) | 07:20(405) | 07:45(406) | 08:05(407) | 08:25(408) | 08:45(409) | 09:00(410) |
| 09:10(411) | 09:20(412) | 09:30(413) | 09:40(414) | 09:50(415) | 10:00(416) | 10:10(417) |
| 10:20(418) | 10:30(419) | 10:45(420) | 11:00(421) | 11:15(422) | 11:30(423) | 11:45(424) |
| 12:00(425) | 12:15(426) | 12:45(427) | 13:10(428) | 13:25(429) | 13:40(430) | 13:55(431) |
| 14:05(432) | 14:15(433) | 14:25(434) | 14:35(435) | 14:45(436) | 14:55(437) | 15:05(438) |
| 16:15(439) | 16:25(440) | 16:35(441) | 16:45(442) | 16:55(443) | 17:05(444) | 17:15(445) |
| 17:25(446) | 17:35(447) | 17:45(448) | 17:55(449) | 18:15(450) | 18:45(451) | 19:15(452) |
| 19:45(453) | 20:15(454) | 20:45(455) | 21:15(456) | 21:25(457) | 21:35(458) | 21:45(459) |
| 21:55(460) | 22:00(461) |  |  |  |  |  |
| **Line 4 (downward)** | 06:55(462) | 07:00(463) | 07:05(464) | 07:10(465) | 07:15(466) | 07:20(467) | 07:35(468) |
| 07:40(469) | 07:45(470) | 07:50(471) | 08:00(472) | 08:10(473) | 08:20(474) | 08:30(475) |
| 08:40(476) | 08:50(477) | 09:00(478) | 09:10(479) | 09:20(480) | 09:30(481) | 09:40(482) |
| 09:50(483) | 10:00(484) | 10:10(485) | 10:30(486) | 10:50(487) | 11:10(488) | 11:30(489) |
| 11:50(490) | 12:10(491) | 12:30(492) | 12:50(493) | 13:10(494) | 13:30(495) | 13:50(496) |
| 14:10(497) | 14:30(498) | 15:10(499) | 15:30(500) | 15:50(501) | 16:10(502) | 16:30(503) |
| 16:45(504) | 17:00(505) | 17:15(506) | 17:30(507) | 17:45(508) | 18:00(509) | 18:30(510) |
| 19:00(511) | 19:30(512) | 20:00(513) | 20:30(514) | 21:00(515) | 21:20(516) | 21:40(517) |
| 22:00(518) |  |  |  |  |  |  |
| **Line 5 (upward)** | 06:30(519) | 06:35(520) | 06:40(521) | 06:45(522) | 06:50(523) | 06:55(524) | 07:00(525) |
| 07:10(526) | 07:20(527) | 07:30(528) | 07:40(529) | 07:50(530) | 08:00(531) | 08:15(532) |
| 08:30(533) | 08:45(534) | 09:00(535) | 09:15(536) | 09:30(537) | 09:45(538) | 10:00(539) |
| 10:15(540) | 10:30(541) | 10:45(542) | 11:00(543) | 11:15(544) | 11:30(545) | 11:45(546) |
| 12:00(547) | 12:30(548) | 13:00(549) | 13:30(550) | 14:00(551) | 14:30(552) | 15:00(553) |
| 15:30(554) | 16:00(555) | 16:15(556) | 16:30(557) | 16:45(558) | 17:00(559) | 17:15(560) |
| 17:30(561) | 17:45(562) | 18:00(563) | 18:15(564) | 18:30(565) | 18:40(566) | 18:50(567) |
| 19:00(568) | 19:10(569) | 19:20(570) | 19:30(571) | 19:40(572) | 19:50(573) | 20:00(574) |
| 20:10(575) | 20:20(576) | 20:30(577) |  |  |  |  |
| **Line 5 (downward)** | 06:30(578) | 06:45(579) | 06:35(580) | 06:55(581) | 07:15(582) | 07:25(583) | 07:35(584) |
| 07:45(585) | 07:55(586) | 08:10(587) | 08:20(588) | 08:30(589) | 08:40(590) | 08:50(591) |
| 09:00(592) | 09:10(593) | 09:20(594) | 09:30(595) | 09:40(596) | 09:50(597) | 10:00(598) |
| 10:30(599) | 11:00(600) | 11:30(601) | 12:00(602) | 12:30(603) | 13:00(604) | 13:30(605) |
| 14:00(606) | 14:30(607) | 15:00(608) | 15:30(609) | 16:00(610) | 16:30(611) | 16:40(612) |
| 16:50(613) | 17:00(614) | 17:10(615) | 17:20(616) | 17:30(617) | 17:40(618) | 17:50(619) |
| 18:00(620) | 18:15(621) | 18:30(622) | 18:45(623) | 19:00(624) | 19:15(625) | 19:30(626) |
| 19:45(627) | 20:00(628) | 20:15(629) | 20:30(630) |  |  |  |
| **Line 6 (upward)** | 06:50(631) | 06:55(632) | 07:00(633) | 07:05(634) | 07:10(635) | 07:15(636) | 07:20(637) |
| 07:25(638) | 07:30(639) | 07:35(640) | 07:40(641) | 07:50(642) | 08:00(643) | 08:10(644) |
| 08:20(645) | 08:35(646) | 08:55(647) | 08:15(648) | 08:35(649) | 08:55(650) | 09:15(651) |
| 09:35(652) | 09:55(653) | 10:15(654) | 10:35(655) | 10:55(656) | 11:15(657) | 11:20(658) |
| 11:25(659) | 11:30(660) | 11:35(661) | 11:40(662) | 11:45(663) | 11:50(664) | 11:55(665) |
| 12:00(666) | 12:10(667) | 12:20(668) | 12:30(669) | 12:40(670) | 12:50(671) | 13:00(672) |
| 13:15(673) | 13:30(674) | 13:45(675) | 13:50(676) | 13:55(677) | 14:00(678) | 14:15(679) |
| 14:30(680) | 14:45(681) | 15:00(682) | 15:15(683) | 15:30(684) | 15:45(685) | 16:00(686) |
| 16:15(687) | 16:30(688) | 16:45(689) | 17:00(690) | 17:15(691) | 17:20(692) | 17:30(693) |
| 17:40(694) | 17:50(695) | 18:00(696) | 18:15(697) | 18:30(698) | 18:45(699) | 19:00(700) |
| 19:45(701) | 20:00(702) | 20:15(703) | 20:30(704) |  |  |  |
| **Line 6 (downward)** | 06:50(705) | 07:00(706) | 07:10(707) | 07:20(708) | 07:30(709) | 07:40(710) | 08:10(711) |
| 08:35(712) | 08:15(713) | 08:55(714) | 09:15(715) | 09:35(716) | 09:55(717) | 10:15(718) |
| 10:35(719) | 10:55(720) | 11:15(721) | 11:20(722) | 11:25(723) | 11:30(724) | 11:35(725) |
| 11:40(726) | 11:45(727) | 11:50(728) | 11:55(729) | 12:00(730) | 12:10(731) | 12:30(732) |
| 12:50(733) | 13:15(734) | 13:30(735) | 13:45(736) | 13:55(737) | 14:15(738) | 14:30(739) |
| 14:45(740) | 15:00(741) | 15:15(742) | 15:30(743) | 15:45(744) | 16:00(745) | 16:15(746) |
| 16:30(747) | 16:45(748) | 17:00(749) | 17:05(750) | 17:10(751) | 17:15(752) | 17:20(753) |
| 17:25(754) | 17:30(755) | 17:35(756) | 17:40(757) | 17:45(758) | 17:50(759) | 18:00(760) |
| 18:15(761) | 18:30(762) | 18:45(763) | 19:00(764) | 19:45(765) | 20:00(766) | 20:15(767) |
| 20:30(768) |  |  |  |  |  |  |
| **Line 7 (upward)** | 07:00(769) | 07:30(770) | 08:00(771) | 08:30(772) | 09:00(773) | 09:30(774) | 10:00(775) |
| 10:30(776) | 11:00(777) | 11:30(778) | 12:00(779) | 12:15(780) | 12:30(781) | 12:45(782) |
| 13:00(783) | 13:15(784) | 13:30(785) | 13:45(786) | 14:00(787) | 14:15(788) | 14:30(789) |
| 14:45(790) | 15:00(791) | 15:30(792) | 16:00(793) | 16:30(794) | 17:00(795) | 17:30(796) |
| 18:00(797) | 18:30(798) | 19:00(799) | 19:30(800) | 20:00(801) |  |  |
| **Line 7 (downward)** | 07:00(802) | 07:15(803) | 07:30(804) | 07:45(805) | 08:00(806) | 08:15(807) | 08:30(808) |
| 08:45(809) | 09:00(810) | 09:15(811) | 09:30(812) | 09:45(813) | 10:00(814) | 10:15(815) |
| 10:30(816) | 11:00(817) | 11:30(818) | 12:00(819) | 12:30(820) | 13:00(821) | 13:30(822) |
| 14:00(823) | 14:30(824) | 15:00(825) | 16:30(826) | 17:00(827) | 17:30(828) | 18:00(829) |
| 18:30(830) | 19:00(831) | 19:30(832) | 20:00(833) |  |  |  |
| **Line 8 (upward)** | 07:00(834) | 07:25(835) | 07:45(836) | 08:05(837) | 08:25(838) | 08:45(839) | 09:05(840) |
| 09:25(841) | 09:45(842) | 10:05(843) | 10:25(844) | 10:45(845) | 11:05(846) | 11:25(847) |
| 11:45(848) | 12:05(849) | 12:25(850) | 12:45(851) | 12:05(852) | 12:25(853) | 12:45(854) |
| 13:05(855) | 13:25(856) | 13:45(857) | 14:05(858) | 14:15(859) | 14:25(860) | 14:35(861) |
| 14:45(862) | 14:55(863) | 15:05(864) | 15:25(865) | 15:45(866) | 16:05(867) | 16:25(868) |
| 16:45(869) | 17:05(870) | 17:25(871) | 17:45(872) | 18:05(873) | 18:25(874) | 18:45(875) |
| 19:05(876) | 19:25(877) | 19:45(878) | 20:05(879) | 20:25(880) | 20:45(881) | 21:05(882) |
| 21:30(883) |  |  |  |  |  |  |
| **Line 8 (downward)** | 07:00(884) | 07:15(885) | 07:30(886) | 07:45(887) | 08:00(888) | 08:15(889) | 09:00(890) |
| 09:30(891) | 10:00(892) | 10:30(893) | 11:00(894) | 11:30(895) | 11:45(896) | 12:00(897) |
| 12:15(898) | 12:30(899) | 12:45(900) | 13:00(901) | 13:30(902) | 14:00(903) | 14:30(904) |
| 15:00(905) | 15:30(906) | 16:00(907) | 16:15(908) | 16:30(909) | 16:40(910) | 16:50(911) |
| 17:00(912) | 17:10(913) | 17:20(914) | 17:30(915) | 17:40(916) | 17:50(917) | 18:00(918) |
| 18:15(919) | 18:30(920) | 18:45(921) | 19:05(922) | 19:25(923) | 19:45(924) | 20:05(925) |
| 20:25(926) | 20:45(927) | 21:05(928) | 21:30(929) |  |  |  |

**Table S5. Optimal schedule scheme for the real-life case.**

| **Depot Name** | **Bus ID** | **Circuits** |
| --- | --- | --- |
| **Depot 1** | **NO.1-1** | 001—007—013—017—020—026—032—038—041—044—048—054—060—063—066—069 |
| **NO.1-2** | 070—004—010—083—087—023—029—035—105—108—111—049—055—124—128—131—211 |
| **NO.1-3** | 072—078—152—157—089—095—098—104—176—181—113 |
| **NO.1-4** | 135—075—081—155—160—092—166—099—173—178—183—116—122—202—207—271 |
| **NO.1-5** | 137—077—151—229—161—094—168—245—250—255—184—118—198—267—270 |
| **NO.1-6** | 138—148—227—232—162—239—169—246—251—256—185—195—266—269—332 |
| **NO.1-7** | 139—149—228—234—163—240—170—247—252—257—186—197—268—330—396 |
| **NO.1-8** | 140—150—230—235—164—241—171—248—253—909—187—199—388—331 |
| **NO.1-9** | 141—221—479—231—236—165—242—172—249—254—188 |
| **NO.1-10** | 142—222—288—237—243—309—314—501—258—189—265—389—394 |
| **NO.1-11** | 213—143—223—289—238—244—310—318—321—190—327—387—392—458 |
| **NO.1-12** | 214—145—225—349—291—298—303—311—319—259—192—384—833—393—460 |
| **NO.1-13** | 215—146—226—350—292—299—304—312—373—322—193—385—454—457 |
| **NO.1-14** | 274—219—287—348—353—297—359—367—315—372—439—444—263—512—577—517 |
| **NO.1-15** | 275—220—410—415—354—358—363—371—502—324—326—570—629 |
| **NO.1-16** | 276—284—411—416—355—360—365—437—793—377—325—451—573 |
| **NO.1-17** | 279—341—414—419—423—492—364—435—685—441—380—565—574 |
| **NO.1-18** | 334—144—224—891—290—296—301—307—313—320—376—191—328—390—456—518 |
| **NO.1-19** | 336—408—480—485—489—780—429—497—609—504—447—569—768 |
| **NO.1-20** | 337—476—813—486—490—494—431—608—686—505—448—624—702 |
| **NO.1-21** | 399—073—147—345—158—025—100—174—179—112—051—123—205—210 |
| **NO.1-22** | 402—338—477—539—545—495—498—556—449—625—703 |
| **NO.1-23** | 405—473—536—542—602—549—552—744—558—509—764—767 |
| **NO.1-24** | 462—470—534—596—544—603—606—682—745—559—619—699—766 |
| **NO.1-25** | 465—532—593—654—658—670—676—740—612—562—799 |
| **NO.1-26** | 466—533—594—655—662—671—677—741—613—563 |
| **NO.1-27** | 468—590—599—659—731—672—679—792—615—697—832 |
| **NO.1-28** | 519—469—591—717—657—668—674—738—866—616—698 |
| **NO.1-29** | 520—531—592—718—660—732—678—826—617—830 |
| **NO.1-30** | 526—649—716—723—782—786—861—748—693—762 |
| **NO.1-31** | 578—281—343—482—421—425—493—368—553—443—382—568—628 |
| **NO.1-32** | 579—529—773—814—726—821—823—905—750—829 |
| **NO.1-33** | 581—530—774—815—727—900—822—860—751—873—921 |
| **NO.1-34** | 583—645—841—844—894—729—855—858—753—920 |
| **NO.1-35** | 634—713—893—818—853—911—757 |
| **NO.1-36** | 637—808—848—899—796 |
| **NO.1-37** | 638—810—895—849—828 |
| **NO.1-38** | 639—839—852—869—872 |
| **NO.1-39** | 641—898—871—918—882 |
| **NO.1-40** | 705—640—890—896—870—916 |
| **NO.1-41** | 707—807—913—919—883 |
| **NO.1-42** | 708—838—914—927 |
| **NO.1-43** | 709—915—928 |
| **NO.1-44** | 770—119—125—203—208—272 |
| **NO.1-45** | 803—837—262—511—453—514—516 |
| **NO.1-46** | 834—836—923—879 |
| **NO.1-47** | 885—889—878—926 |
| **NO.1-48** | 886—264—329—391—395 |
| **Depot 2** | **NO.2-1** | 000—006—012—016—019—024—030—036—040—043—046—052—058—062—065—068 |
| **NO.2-2** | 277—339—412—417—356—361—369—499—687—378—383—571—630 |
| **NO.2-3** | 278—340—413—418—422—491—362—432—438—440—379—510—572 |
| **NO.2-4** | 280—342—481—420—424—366—433—554—442—381—566—575 |
| **NO.2-5** | 403—407—478—540—546—550—607—684—746—507—623—704 |
| **NO.2-6** | 404—471—535—541—547—604—551—742—557—508—700—765 |
| **NO.2-7** | 463—472—714—538—600—665—605—680—743—868—560—621—800 |
| **NO.2-8** | 464—474—595—816—601—669—675—739—683—611—561—622—801 |
| **NO.2-9** | 467—589—598—656—666—673—681—614—696—763 |
| **NO.2-10** | 522—585—647—719—663—734—789—907—689—620—876 |
| **NO.2-11** | 523—586—650—720—664—735—790—867—690—758—875 |
| **NO.2-12** | 524—587—651—721—667—736—862—747—691—760—922 |
| **NO.2-13** | 631—643—811—843—730—856—859—791—754 |
| **NO.2-14** | 632—648—842—777—779—901—903—910—755 |
| **NO.2-15** | 633—711—840—892—778—850—902—756 |
| **NO.2-16** | 635—771—809—846—819—827—759 |
| **NO.2-17** | 636—772—847—897—854—795—797 |
| **NO.2-18** | 706—642—912—917 |
| **NO.2-19** | 769—805—924—880 |
| **NO.2-20** | 804—110—047—053—059—127—130—133 |
| **NO.2-21** | 884—887—877—925 |
| **Depot 3** | **NO.3-1** | 002—710—346—088—028—785—555—050—200—513—067 |
| **NO.3-2** | 071—005—079—014—085—018—488—167—824—503—761—386—209 |
| **NO.3-3** | 136—283—344—653—487—093—031—101—106—182—117—057—627—134 |
| **NO.3-4** | 216—008—409—484—722—781—308—317—374—260—196—126—064—459 |
| **NO.3-5** | 217—285—084—294—302—430—177—045—114—194—626—576—461 |
| **NO.3-6** | 273—218—286—347—352—295—357—306—370—500—323 |
| **NO.3-7** | 335—282—082—156—300—428—434—109—692—120—452—129—132 |
| **NO.3-8** | 397—406—475—537—543—548—496—825—610—506—564—701 |
| **NO.3-9** | 398—003—009—015—086—021—027—033—103—107 |
| **NO.3-10** | 400—074—080—154—159—091—097—102—175—180—115—121—201—206—212 |
| **NO.3-11** | 401—076—011—483—090—096—034—039—042—446—450—204 |
| **NO.3-12** | 521—584—646—597—845—661—733—737—863—906—688—618—831 |
| **NO.3-13** | 525—588—652—233—022—427—037—436—908—445—056—061—515—333 |
| **NO.3-14** | 527—712—775—724—783—787—864—794—694—798 |
| **NO.3-15** | 580—528—715—776—725—820—784—788—749—695 |
| **NO.3-16** | 582—644—812—817—728—851—857—904—752—874 |
| **NO.3-17** | 802—806—881—929 |
| **NO.3-18** | 835—888—153—351—293—426—305—316—865—375—261—567—455 |
